# Supplementary material for: Determination of Maximum Oil Yield, Quality Indicators and Absorbance Spectra of Hulled Sunflower Seeds Oil Extraction under Axial Loading
Source: MDPI journal article supplement (doi:10.3390/foods11182866), 2022-09-16
Supplement: s1 [file s1]

Article

# Determination of Maximum Oil Yield, Quality Indicators and Absorbance Spectra of Hulled Sunflower Seeds Oil Extraction under Axial Loading

Abraham Kabutey\*, David Herák, Čestmír Mizera

Department of Mechanical Engineering, Faculty of Engineering, Czech University of Life Sciences Prague,  
165 20 Prague, Czech Republic

\* Correspondence: kabutey@tf.czu.cz (A.K.); Tel.: +42-02-2438-3180

**Table S1.** Descriptive statistics of the factors effect on absorbance and transmittance.

| Effect  | Level of factor, WL (nm) | Level of factor, TP (°C) | N | Mean, A (-) | SD, A (-) | SE, A (-) | Mean, T (%) | SD, T (%) | SE, T (%) |
|---------|--------------------------|--------------------------|---|-------------|-----------|-----------|-------------|-----------|-----------|
| WL x TP | 325                      | 24                       | 3 | 0.410       | 0.041     | 0.024     | 39.000      | 3.635     | 2.098     |
|         | 325                      | 40                       | 3 | 0.280       | 0.026     | 0.015     | 52.533      | 3.002     | 1.733     |
|         | 325                      | 60                       | 3 | 0.360       | 0.023     | 0.013     | 43.700      | 2.254     | 1.301     |
|         | 325                      | 80                       | 3 | 0.512       | 0.022     | 0.013     | 29.400      | 3.900     | 2.252     |
|         | 330                      | 24                       | 3 | 0.408       | 0.041     | 0.024     | 39.167      | 3.669     | 2.118     |
|         | 330                      | 40                       | 3 | 0.284       | 0.024     | 0.014     | 52.000      | 2.955     | 1.706     |
|         | 330                      | 60                       | 3 | 0.362       | 0.026     | 0.015     | 43.600      | 2.524     | 1.457     |
|         | 330                      | 80                       | 3 | 0.502       | 0.036     | 0.021     | 31.467      | 2.570     | 1.484     |
|         | 335                      | 24                       | 3 | 0.415       | 0.042     | 0.024     | 38.667      | 3.790     | 2.188     |
|         | 335                      | 40                       | 3 | 0.289       | 0.029     | 0.017     | 51.433      | 3.329     | 1.922     |
|         | 335                      | 60                       | 3 | 0.367       | 0.027     | 0.015     | 43.067      | 2.558     | 1.477     |
|         | 335                      | 80                       | 3 | 0.515       | 0.038     | 0.022     | 30.700      | 2.663     | 1.537     |
|         | 340                      | 24                       | 3 | 1.104       | 0.079     | 0.045     | 8.167       | 0.961     | 0.555     |
|         | 340                      | 40                       | 3 | 0.890       | 0.027     | 0.016     | 13.333      | 0.945     | 0.546     |
|         | 340                      | 60                       | 3 | 0.815       | 0.008     | 0.005     | 13.733      | 0.379     | 0.219     |
|         | 340                      | 80                       | 3 | 0.867       | 0.013     | 0.007     | 13.633      | 0.666     | 0.384     |
|         | 345                      | 24                       | 3 | 1.275       | 0.008     | 0.005     | 5.200       | 0.346     | 0.200     |
|         | 345                      | 40                       | 3 | 1.091       | 0.067     | 0.038     | 8.633       | 1.436     | 0.829     |
|         | 345                      | 60                       | 3 | 1.070       | 0.022     | 0.013     | 9.000       | 0.346     | 0.200     |
|         | 345                      | 80                       | 3 | 1.127       | 0.025     | 0.014     | 7.367       | 0.473     | 0.273     |
|         | 350                      | 24                       | 3 | 1.291       | 0.055     | 0.032     | 5.167       | 0.611     | 0.353     |
|         | 350                      | 40                       | 3 | 1.102       | 0.078     | 0.045     | 7.900       | 1.480     | 0.854     |
|         | 350                      | 60                       | 3 | 1.175       | 0.027     | 0.016     | 6.500       | 0.436     | 0.252     |
|         | 350                      | 80                       | 3 | 1.293       | 0.028     | 0.016     | 5.067       | 0.321     | 0.186     |
|         | 355                      | 24                       | 3 | 1.260       | 0.048     | 0.027     | 5.800       | 0.361     | 0.208     |
|         | 355                      | 40                       | 3 | 1.078       | 0.080     | 0.046     | 8.600       | 1.652     | 0.954     |
|         | 355                      | 60                       | 3 | 1.175       | 0.026     | 0.015     | 6.667       | 0.416     | 0.240     |

|         |     |    |   |       |       |       |        |       |       |
|---------|-----|----|---|-------|-------|-------|--------|-------|-------|
| WL x TP | 355 | 80 | 3 | 1.305 | 0.035 | 0.020 | 5.000  | 0.400 | 0.231 |
|         | 360 | 24 | 3 | 1.208 | 0.052 | 0.030 | 6.233  | 0.702 | 0.406 |
|         | 360 | 40 | 3 | 1.021 | 0.079 | 0.046 | 9.600  | 1.646 | 0.950 |
|         | 360 | 60 | 3 | 1.140 | 0.041 | 0.024 | 7.300  | 0.721 | 0.416 |
|         | 360 | 80 | 3 | 1.252 | 0.032 | 0.019 | 5.567  | 0.416 | 0.240 |
|         | 365 | 24 | 3 | 1.139 | 0.054 | 0.031 | 7.267  | 0.902 | 0.521 |
|         | 365 | 40 | 3 | 0.943 | 0.083 | 0.048 | 11.533 | 2.113 | 1.220 |
|         | 365 | 60 | 3 | 1.049 | 0.033 | 0.019 | 8.933  | 0.666 | 0.384 |
|         | 365 | 80 | 3 | 1.187 | 0.028 | 0.016 | 6.533  | 0.404 | 0.233 |
|         | 370 | 24 | 3 | 1.032 | 0.052 | 0.030 | 9.333  | 1.106 | 0.639 |
|         | 370 | 40 | 3 | 0.839 | 0.076 | 0.044 | 14.633 | 2.367 | 1.367 |
|         | 370 | 60 | 3 | 0.935 | 0.035 | 0.020 | 11.633 | 0.929 | 0.536 |
|         | 370 | 80 | 3 | 1.112 | 0.030 | 0.017 | 7.700  | 0.529 | 0.306 |
|         | 375 | 24 | 3 | 0.955 | 0.050 | 0.029 | 11.100 | 1.253 | 0.723 |
|         | 375 | 40 | 3 | 0.756 | 0.077 | 0.044 | 17.700 | 2.951 | 1.704 |
|         | 375 | 60 | 3 | 0.847 | 0.030 | 0.018 | 14.200 | 0.964 | 0.557 |
|         | 375 | 80 | 3 | 1.055 | 0.033 | 0.019 | 8.833  | 0.643 | 0.371 |
|         | 380 | 24 | 3 | 0.886 | 0.048 | 0.027 | 13.067 | 1.401 | 0.809 |
|         | 380 | 40 | 3 | 0.691 | 0.068 | 0.039 | 20.533 | 3.066 | 1.770 |
|         | 380 | 60 | 3 | 0.769 | 0.030 | 0.017 | 17.033 | 1.155 | 0.667 |
|         | 380 | 80 | 3 | 1.004 | 0.033 | 0.019 | 9.933  | 0.737 | 0.426 |
|         | 385 | 24 | 3 | 0.827 | 0.045 | 0.026 | 14.933 | 1.550 | 0.895 |
|         | 385 | 40 | 3 | 0.636 | 0.060 | 0.035 | 23.233 | 3.086 | 1.782 |
|         | 385 | 60 | 3 | 0.704 | 0.030 | 0.017 | 19.833 | 1.332 | 0.769 |
|         | 385 | 80 | 3 | 0.956 | 0.023 | 0.013 | 11.100 | 0.557 | 0.321 |
|         | 390 | 24 | 3 | 0.788 | 0.045 | 0.026 | 16.367 | 1.701 | 0.982 |
|         | 390 | 40 | 3 | 0.600 | 0.053 | 0.031 | 25.200 | 2.955 | 1.706 |
|         | 390 | 60 | 3 | 0.659 | 0.028 | 0.016 | 21.967 | 1.365 | 0.788 |
|         | 390 | 80 | 3 | 0.917 | 0.016 | 0.009 | 12.100 | 0.458 | 0.265 |
|         | 395 | 24 | 3 | 0.763 | 0.045 | 0.026 | 17.300 | 1.808 | 1.044 |
|         | 395 | 40 | 3 | 0.576 | 0.049 | 0.028 | 26.667 | 2.892 | 1.670 |
|         | 395 | 60 | 3 | 0.634 | 0.029 | 0.017 | 23.267 | 1.537 | 0.888 |
|         | 395 | 80 | 3 | 0.891 | 0.016 | 0.009 | 12.867 | 0.513 | 0.296 |
|         | 400 | 24 | 3 | 0.746 | 0.044 | 0.025 | 18.000 | 1.808 | 1.044 |
|         | 400 | 40 | 3 | 0.564 | 0.040 | 0.023 | 27.333 | 2.570 | 1.484 |
|         | 400 | 60 | 3 | 0.615 | 0.029 | 0.017 | 24.333 | 1.607 | 0.928 |
|         | 400 | 80 | 3 | 0.877 | 0.018 | 0.010 | 13.267 | 0.551 | 0.318 |
|         | 405 | 24 | 3 | 0.730 | 0.045 | 0.026 | 18.667 | 1.955 | 1.129 |
|         | 405 | 40 | 3 | 0.551 | 0.037 | 0.022 | 28.200 | 2.364 | 1.365 |
|         | 405 | 60 | 3 | 0.603 | 0.030 | 0.017 | 24.967 | 1.629 | 0.940 |
|         | 405 | 80 | 3 | 0.864 | 0.020 | 0.011 | 13.700 | 0.656 | 0.379 |
|         | 410 | 24 | 3 | 0.717 | 0.045 | 0.026 | 19.233 | 2.003 | 1.157 |
|         | 410 | 40 | 3 | 0.538 | 0.029 | 0.017 | 28.833 | 2.255 | 1.302 |
|         | 410 | 60 | 3 | 0.594 | 0.028 | 0.016 | 25.467 | 1.617 | 0.933 |
|         | 410 | 80 | 3 | 0.852 | 0.022 | 0.013 | 14.067 | 0.751 | 0.433 |
|         | 415 | 24 | 3 | 0.707 | 0.046 | 0.027 | 19.733 | 2.103 | 1.214 |
|         | 415 | 40 | 3 | 0.529 | 0.025 | 0.014 | 29.600 | 1.670 | 0.964 |

|         |     |    |   |       |       |       |        |       |       |
|---------|-----|----|---|-------|-------|-------|--------|-------|-------|
| WL x TP | 415 | 60 | 3 | 0.588 | 0.030 | 0.017 | 25.900 | 1.735 | 1.002 |
|         | 415 | 80 | 3 | 0.843 | 0.023 | 0.013 | 14.367 | 0.808 | 0.467 |
|         | 420 | 24 | 3 | 0.698 | 0.046 | 0.027 | 20.133 | 2.150 | 1.241 |
|         | 420 | 40 | 3 | 0.521 | 0.024 | 0.014 | 30.133 | 1.656 | 0.956 |
|         | 420 | 60 | 3 | 0.582 | 0.032 | 0.019 | 26.267 | 1.877 | 1.084 |
|         | 420 | 80 | 3 | 0.834 | 0.026 | 0.015 | 14.667 | 0.874 | 0.504 |
|         | 425 | 24 | 3 | 0.690 | 0.045 | 0.026 | 20.500 | 2.100 | 1.212 |
|         | 425 | 40 | 3 | 0.515 | 0.024 | 0.014 | 30.600 | 1.652 | 0.954 |
|         | 425 | 60 | 3 | 0.578 | 0.033 | 0.019 | 26.467 | 1.966 | 1.135 |
|         | 425 | 80 | 3 | 0.827 | 0.025 | 0.014 | 14.900 | 0.819 | 0.473 |
|         | 430 | 24 | 3 | 0.682 | 0.044 | 0.025 | 20.867 | 2.101 | 1.213 |
|         | 430 | 40 | 3 | 0.508 | 0.023 | 0.013 | 31.133 | 1.656 | 0.956 |
|         | 430 | 60 | 3 | 0.575 | 0.031 | 0.018 | 26.667 | 1.815 | 1.048 |
|         | 430 | 80 | 3 | 0.818 | 0.023 | 0.014 | 15.200 | 0.819 | 0.473 |
|         | 435 | 24 | 3 | 0.674 | 0.043 | 0.025 | 21.233 | 2.050 | 1.184 |
|         | 435 | 40 | 3 | 0.501 | 0.022 | 0.013 | 31.600 | 1.637 | 0.945 |
|         | 435 | 60 | 3 | 0.570 | 0.028 | 0.016 | 26.933 | 1.701 | 0.982 |
|         | 435 | 80 | 3 | 0.810 | 0.022 | 0.013 | 15.500 | 0.755 | 0.436 |
|         | 440 | 24 | 3 | 0.666 | 0.041 | 0.024 | 21.600 | 2.000 | 1.155 |
|         | 440 | 40 | 3 | 0.494 | 0.022 | 0.013 | 32.067 | 1.617 | 0.933 |
|         | 440 | 60 | 3 | 0.565 | 0.027 | 0.015 | 27.267 | 1.665 | 0.961 |
|         | 440 | 80 | 3 | 0.802 | 0.021 | 0.012 | 15.800 | 0.755 | 0.436 |
|         | 445 | 24 | 3 | 0.660 | 0.039 | 0.023 | 21.933 | 2.001 | 1.155 |
|         | 445 | 40 | 3 | 0.491 | 0.022 | 0.013 | 32.333 | 1.595 | 0.921 |
|         | 445 | 60 | 3 | 0.564 | 0.025 | 0.015 | 27.367 | 1.595 | 0.921 |
|         | 445 | 80 | 3 | 0.798 | 0.021 | 0.012 | 15.933 | 0.764 | 0.441 |
|         | 450 | 24 | 3 | 0.659 | 0.039 | 0.022 | 21.967 | 1.904 | 1.099 |
|         | 450 | 40 | 3 | 0.492 | 0.023 | 0.013 | 32.233 | 1.779 | 1.027 |
|         | 450 | 60 | 3 | 0.566 | 0.026 | 0.015 | 27.200 | 1.609 | 0.929 |
|         | 450 | 80 | 3 | 0.798 | 0.020 | 0.012 | 15.900 | 0.721 | 0.416 |
|         | 455 | 24 | 3 | 0.656 | 0.038 | 0.022 | 22.167 | 1.904 | 1.099 |
|         | 455 | 40 | 3 | 0.501 | 0.018 | 0.010 | 32.200 | 1.015 | 0.586 |
|         | 455 | 60 | 3 | 0.565 | 0.025 | 0.014 | 27.233 | 1.553 | 0.897 |
|         | 455 | 80 | 3 | 0.797 | 0.019 | 0.011 | 16.000 | 0.700 | 0.404 |
|         | 460 | 24 | 3 | 0.651 | 0.037 | 0.021 | 22.400 | 1.852 | 1.069 |
|         | 460 | 40 | 3 | 0.486 | 0.022 | 0.012 | 32.633 | 1.607 | 0.928 |
|         | 460 | 60 | 3 | 0.562 | 0.025 | 0.014 | 27.433 | 1.582 | 0.913 |
|         | 460 | 80 | 3 | 0.791 | 0.018 | 0.010 | 16.233 | 0.643 | 0.371 |
|         | 465 | 24 | 3 | 0.643 | 0.036 | 0.021 | 22.833 | 1.856 | 1.071 |
|         | 465 | 40 | 3 | 0.480 | 0.020 | 0.012 | 33.167 | 1.550 | 0.895 |
|         | 465 | 60 | 3 | 0.554 | 0.025 | 0.014 | 27.933 | 1.582 | 0.913 |
|         | 465 | 80 | 3 | 0.779 | 0.018 | 0.010 | 16.633 | 0.635 | 0.367 |
|         | 470 | 24 | 3 | 0.635 | 0.035 | 0.020 | 23.200 | 1.868 | 1.079 |
|         | 470 | 40 | 3 | 0.473 | 0.019 | 0.011 | 33.700 | 1.493 | 0.862 |
|         | 470 | 60 | 3 | 0.545 | 0.025 | 0.014 | 28.533 | 1.582 | 0.913 |
|         | 470 | 80 | 3 | 0.767 | 0.019 | 0.011 | 17.133 | 0.723 | 0.418 |
|         | 475 | 24 | 3 | 0.629 | 0.035 | 0.020 | 23.567 | 1.922 | 1.110 |

|         |     |    |   |       |       |       |        |       |       |
|---------|-----|----|---|-------|-------|-------|--------|-------|-------|
| WL x TP | 475 | 40 | 3 | 0.468 | 0.019 | 0.011 | 34.033 | 1.436 | 0.829 |
|         | 475 | 60 | 3 | 0.539 | 0.023 | 0.013 | 29.000 | 1.572 | 0.907 |
|         | 475 | 80 | 3 | 0.759 | 0.018 | 0.010 | 17.433 | 0.737 | 0.426 |
|         | 480 | 24 | 3 | 0.625 | 0.034 | 0.020 | 23.767 | 1.922 | 1.110 |
|         | 480 | 40 | 3 | 0.466 | 0.018 | 0.010 | 34.267 | 1.380 | 0.797 |
|         | 480 | 60 | 3 | 0.534 | 0.022 | 0.013 | 29.233 | 1.457 | 0.841 |
|         | 480 | 80 | 3 | 0.753 | 0.019 | 0.011 | 17.633 | 0.737 | 0.426 |
|         | 485 | 24 | 3 | 0.620 | 0.034 | 0.020 | 24.033 | 1.877 | 1.084 |
|         | 485 | 40 | 3 | 0.463 | 0.018 | 0.010 | 34.467 | 1.380 | 0.797 |
|         | 485 | 60 | 3 | 0.531 | 0.021 | 0.012 | 29.500 | 1.453 | 0.839 |
|         | 485 | 80 | 3 | 0.748 | 0.019 | 0.011 | 17.867 | 0.777 | 0.448 |
|         | 490 | 24 | 3 | 0.614 | 0.033 | 0.019 | 24.333 | 1.845 | 1.065 |
|         | 490 | 40 | 3 | 0.457 | 0.018 | 0.010 | 35.000 | 1.418 | 0.819 |
|         | 490 | 60 | 3 | 0.524 | 0.020 | 0.012 | 30.000 | 1.400 | 0.808 |
|         | 490 | 80 | 3 | 0.739 | 0.019 | 0.011 | 18.233 | 0.833 | 0.481 |
|         | 495 | 24 | 3 | 0.607 | 0.034 | 0.020 | 24.733 | 1.943 | 1.122 |
|         | 495 | 40 | 3 | 0.450 | 0.017 | 0.010 | 35.500 | 1.308 | 0.755 |
|         | 495 | 60 | 3 | 0.515 | 0.019 | 0.011 | 30.533 | 1.305 | 0.754 |
|         | 495 | 80 | 3 | 0.727 | 0.021 | 0.012 | 18.767 | 0.874 | 0.504 |
|         | 500 | 24 | 3 | 0.598 | 0.035 | 0.020 | 25.300 | 1.997 | 1.153 |
|         | 500 | 40 | 3 | 0.441 | 0.016 | 0.010 | 36.233 | 1.332 | 0.769 |
|         | 500 | 60 | 3 | 0.505 | 0.018 | 0.010 | 31.333 | 1.305 | 0.754 |
|         | 500 | 80 | 3 | 0.716 | 0.017 | 0.010 | 19.233 | 0.808 | 0.467 |
|         | 505 | 24 | 3 | 0.589 | 0.035 | 0.020 | 25.833 | 2.011 | 1.161 |
|         | 505 | 40 | 3 | 0.431 | 0.017 | 0.010 | 37.100 | 1.389 | 0.802 |
|         | 505 | 60 | 3 | 0.492 | 0.018 | 0.010 | 32.200 | 1.353 | 0.781 |
|         | 505 | 80 | 3 | 0.698 | 0.024 | 0.014 | 20.100 | 1.114 | 0.643 |
|         | 510 | 24 | 3 | 0.579 | 0.035 | 0.020 | 26.400 | 2.066 | 1.193 |
|         | 510 | 40 | 3 | 0.423 | 0.016 | 0.009 | 37.733 | 1.328 | 0.767 |
|         | 510 | 60 | 3 | 0.482 | 0.018 | 0.010 | 33.000 | 1.311 | 0.757 |
|         | 510 | 80 | 3 | 0.684 | 0.024 | 0.014 | 20.700 | 1.114 | 0.643 |
|         | 515 | 24 | 3 | 0.571 | 0.034 | 0.020 | 26.867 | 2.026 | 1.170 |
|         | 515 | 40 | 3 | 0.413 | 0.018 | 0.010 | 38.600 | 1.587 | 0.917 |
|         | 515 | 60 | 3 | 0.471 | 0.019 | 0.011 | 33.833 | 1.464 | 0.845 |
|         | 515 | 80 | 3 | 0.674 | 0.023 | 0.013 | 21.200 | 1.114 | 0.643 |
|         | 520 | 24 | 3 | 0.566 | 0.032 | 0.019 | 27.267 | 2.026 | 1.170 |
|         | 520 | 40 | 3 | 0.408 | 0.018 | 0.011 | 39.033 | 1.626 | 0.939 |
|         | 520 | 60 | 3 | 0.466 | 0.019 | 0.011 | 34.233 | 1.504 | 0.869 |
|         | 520 | 80 | 3 | 0.668 | 0.022 | 0.013 | 21.500 | 1.114 | 0.643 |
|         | 525 | 24 | 3 | 0.561 | 0.033 | 0.019 | 27.600 | 2.042 | 1.179 |
|         | 525 | 40 | 3 | 0.404 | 0.017 | 0.010 | 39.500 | 1.609 | 0.929 |
|         | 525 | 60 | 3 | 0.461 | 0.019 | 0.011 | 34.667 | 1.557 | 0.899 |
|         | 525 | 80 | 3 | 0.662 | 0.021 | 0.012 | 21.767 | 1.050 | 0.606 |
|         | 530 | 24 | 3 | 0.555 | 0.033 | 0.019 | 27.900 | 2.042 | 1.179 |
|         | 530 | 40 | 3 | 0.400 | 0.017 | 0.010 | 39.767 | 1.464 | 0.845 |
|         | 530 | 60 | 3 | 0.456 | 0.019 | 0.011 | 35.067 | 1.557 | 0.899 |
|         | 530 | 80 | 3 | 0.659 | 0.021 | 0.012 | 21.967 | 1.060 | 0.612 |

|         |     |    |   |       |       |       |        |       |       |
|---------|-----|----|---|-------|-------|-------|--------|-------|-------|
| WL x TP | 535 | 24 | 3 | 0.551 | 0.032 | 0.019 | 28.100 | 2.042 | 1.179 |
|         | 535 | 40 | 3 | 0.397 | 0.016 | 0.009 | 40.100 | 1.473 | 0.850 |
|         | 535 | 60 | 3 | 0.453 | 0.019 | 0.011 | 35.300 | 1.552 | 0.896 |
|         | 535 | 80 | 3 | 0.656 | 0.020 | 0.011 | 22.100 | 1.015 | 0.586 |
|         | 540 | 24 | 3 | 0.549 | 0.031 | 0.018 | 28.267 | 2.026 | 1.170 |
|         | 540 | 40 | 3 | 0.395 | 0.015 | 0.009 | 40.267 | 1.365 | 0.788 |
|         | 540 | 60 | 3 | 0.447 | 0.019 | 0.011 | 35.467 | 1.557 | 0.899 |
|         | 540 | 80 | 3 | 0.653 | 0.019 | 0.011 | 22.267 | 1.002 | 0.578 |
|         | 545 | 24 | 3 | 0.551 | 0.031 | 0.018 | 28.233 | 1.986 | 1.146 |
|         | 545 | 40 | 3 | 0.396 | 0.014 | 0.008 | 40.200 | 1.253 | 0.723 |
|         | 545 | 60 | 3 | 0.452 | 0.020 | 0.012 | 35.367 | 1.656 | 0.956 |
|         | 545 | 80 | 3 | 0.655 | 0.020 | 0.012 | 22.167 | 1.097 | 0.633 |
|         | 550 | 24 | 3 | 0.548 | 0.030 | 0.018 | 28.400 | 1.947 | 1.124 |
|         | 550 | 40 | 3 | 0.394 | 0.014 | 0.008 | 40.433 | 1.301 | 0.751 |
|         | 550 | 60 | 3 | 0.449 | 0.022 | 0.013 | 35.567 | 1.801 | 1.040 |
|         | 550 | 80 | 3 | 0.652 | 0.020 | 0.012 | 22.300 | 1.058 | 0.611 |
|         | 555 | 24 | 3 | 0.543 | 0.029 | 0.017 | 28.700 | 1.873 | 1.082 |
|         | 555 | 40 | 3 | 0.390 | 0.014 | 0.008 | 40.800 | 1.300 | 0.751 |
|         | 555 | 60 | 3 | 0.445 | 0.024 | 0.014 | 35.900 | 1.900 | 1.097 |
|         | 555 | 80 | 3 | 0.647 | 0.021 | 0.012 | 22.533 | 1.115 | 0.644 |
|         | 560 | 24 | 3 | 0.540 | 0.028 | 0.016 | 28.933 | 1.795 | 1.037 |
|         | 560 | 40 | 3 | 0.386 | 0.013 | 0.007 | 41.167 | 1.222 | 0.706 |
|         | 560 | 60 | 3 | 0.442 | 0.024 | 0.014 | 36.167 | 1.950 | 1.126 |
|         | 560 | 80 | 3 | 0.643 | 0.021 | 0.012 | 22.733 | 1.115 | 0.644 |
|         | 565 | 24 | 3 | 0.535 | 0.028 | 0.016 | 29.233 | 1.818 | 1.049 |
|         | 565 | 40 | 3 | 0.384 | 0.013 | 0.007 | 41.367 | 1.222 | 0.706 |
|         | 565 | 60 | 3 | 0.440 | 0.025 | 0.014 | 36.333 | 2.101 | 1.213 |
|         | 565 | 80 | 3 | 0.640 | 0.021 | 0.012 | 22.900 | 1.136 | 0.656 |
|         | 570 | 24 | 3 | 0.532 | 0.027 | 0.016 | 29.400 | 1.778 | 1.026 |
|         | 570 | 40 | 3 | 0.381 | 0.013 | 0.007 | 41.633 | 1.168 | 0.674 |
|         | 570 | 60 | 3 | 0.437 | 0.025 | 0.014 | 36.567 | 2.103 | 1.214 |
|         | 570 | 80 | 3 | 0.637 | 0.022 | 0.013 | 23.067 | 1.172 | 0.677 |
|         | 575 | 24 | 3 | 0.529 | 0.026 | 0.015 | 29.600 | 1.778 | 1.026 |
|         | 575 | 40 | 3 | 0.379 | 0.013 | 0.008 | 41.767 | 1.258 | 0.726 |
|         | 575 | 60 | 3 | 0.435 | 0.025 | 0.014 | 36.733 | 2.101 | 1.213 |
|         | 575 | 80 | 3 | 0.634 | 0.023 | 0.013 | 23.267 | 1.250 | 0.722 |
|         | 580 | 24 | 3 | 0.526 | 0.025 | 0.015 | 29.833 | 1.721 | 0.994 |
|         | 580 | 40 | 3 | 0.377 | 0.013 | 0.008 | 42.033 | 1.266 | 0.731 |
|         | 580 | 60 | 3 | 0.433 | 0.024 | 0.014 | 36.933 | 2.055 | 1.186 |
|         | 580 | 80 | 3 | 0.631 | 0.022 | 0.013 | 23.400 | 1.217 | 0.702 |
|         | 585 | 24 | 3 | 0.518 | 0.024 | 0.014 | 30.367 | 1.665 | 0.961 |
|         | 585 | 40 | 3 | 0.372 | 0.014 | 0.008 | 42.533 | 1.266 | 0.731 |
|         | 585 | 60 | 3 | 0.428 | 0.023 | 0.013 | 37.367 | 1.960 | 1.132 |
|         | 585 | 80 | 3 | 0.622 | 0.022 | 0.013 | 23.867 | 1.250 | 0.722 |
|         | 590 | 24 | 3 | 0.517 | 0.024 | 0.014 | 30.433 | 1.650 | 0.953 |
|         | 590 | 40 | 3 | 0.372 | 0.013 | 0.007 | 42.533 | 1.168 | 0.674 |
|         | 590 | 60 | 3 | 0.428 | 0.022 | 0.013 | 37.300 | 1.868 | 1.079 |

|     |    |   |       |       |       |        |       |       |
|-----|----|---|-------|-------|-------|--------|-------|-------|
| 590 | 80 | 3 | 0.622 | 0.023 | 0.013 | 23.900 | 1.217 | 0.702 |
| 595 | 24 | 3 | 0.518 | 0.024 | 0.014 | 30.367 | 1.665 | 0.961 |
| 595 | 40 | 3 | 0.373 | 0.012 | 0.007 | 42.367 | 1.159 | 0.669 |
| 595 | 60 | 3 | 0.431 | 0.020 | 0.011 | 37.133 | 1.716 | 0.991 |
| 595 | 80 | 3 | 0.624 | 0.023 | 0.013 | 23.767 | 1.242 | 0.717 |
| 600 | 24 | 3 | 0.516 | 0.024 | 0.014 | 30.500 | 1.682 | 0.971 |
| 600 | 40 | 3 | 0.371 | 0.012 | 0.007 | 42.567 | 1.102 | 0.636 |
| 600 | 60 | 3 | 0.428 | 0.020 | 0.011 | 37.367 | 1.662 | 0.960 |
| 600 | 80 | 3 | 0.621 | 0.022 | 0.013 | 23.967 | 1.242 | 0.717 |

WL: Wavelength (nm); TP: Temperature (°C); A: Absorbance (-); T: Transmittance (%); N: Number of replications; SD: Standard Deviation and SE: Standard Error.

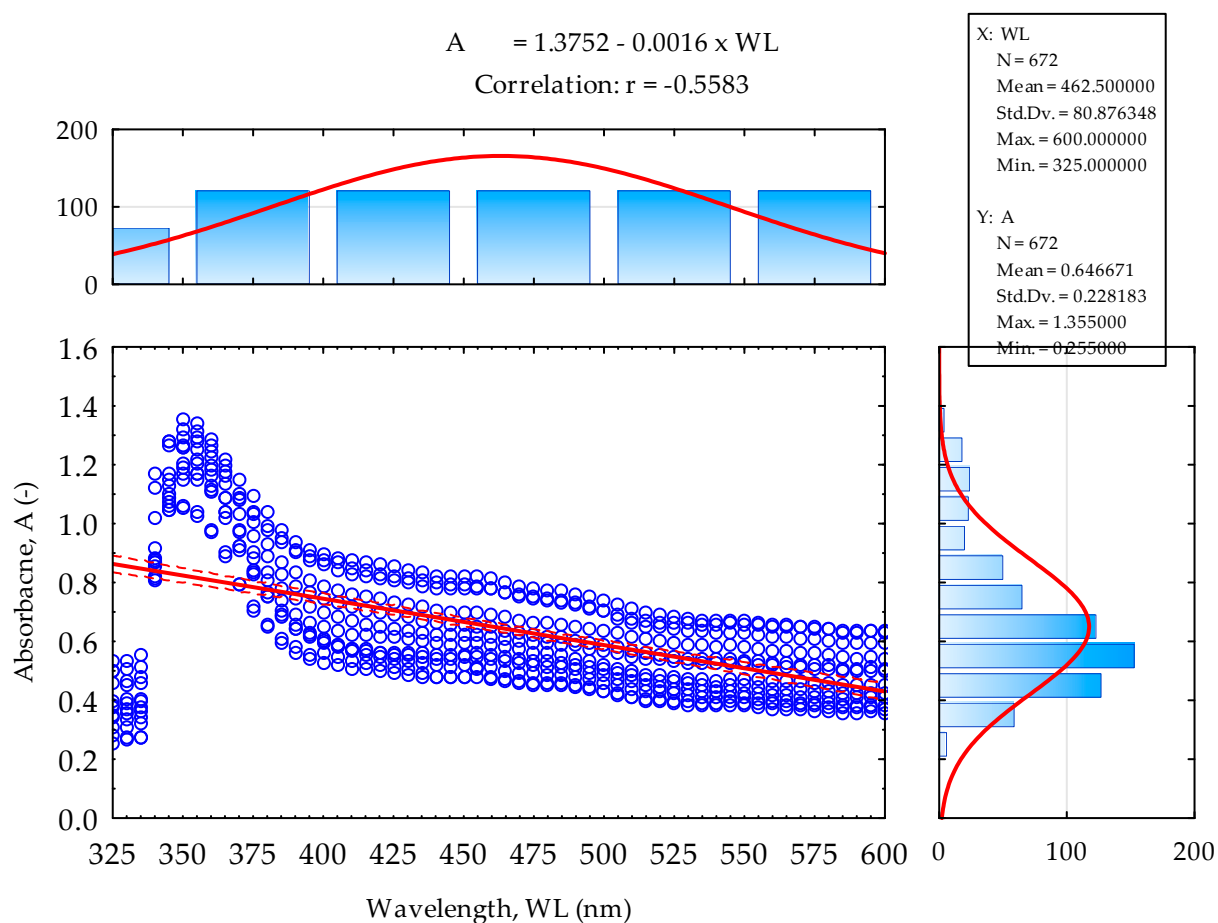

**Figure S1.** Scatterplot of absorbance versus wavelength at 95% confidence interval.

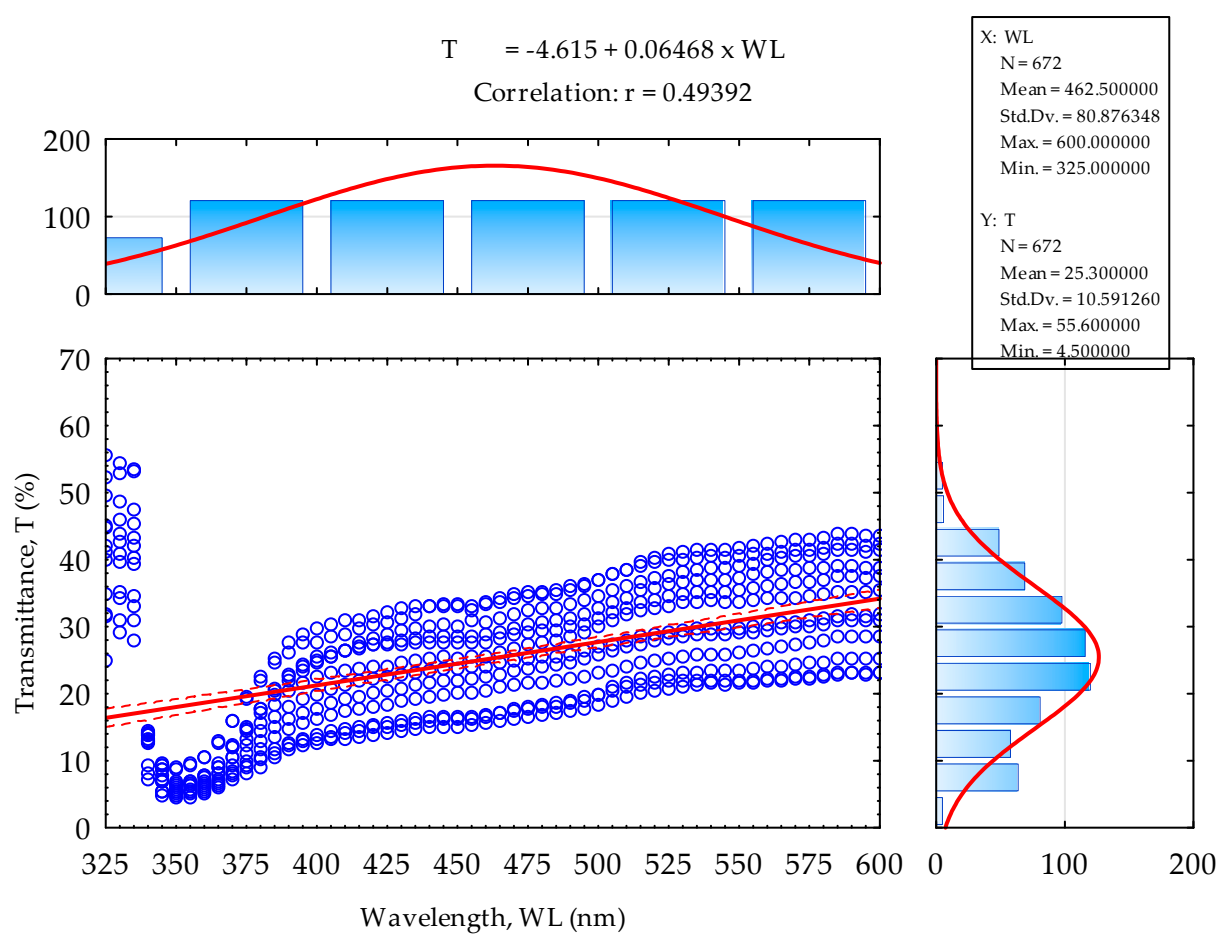

**Figure S2.** Scatterplot of transmittance versus wavelength at 95% confidence interval.

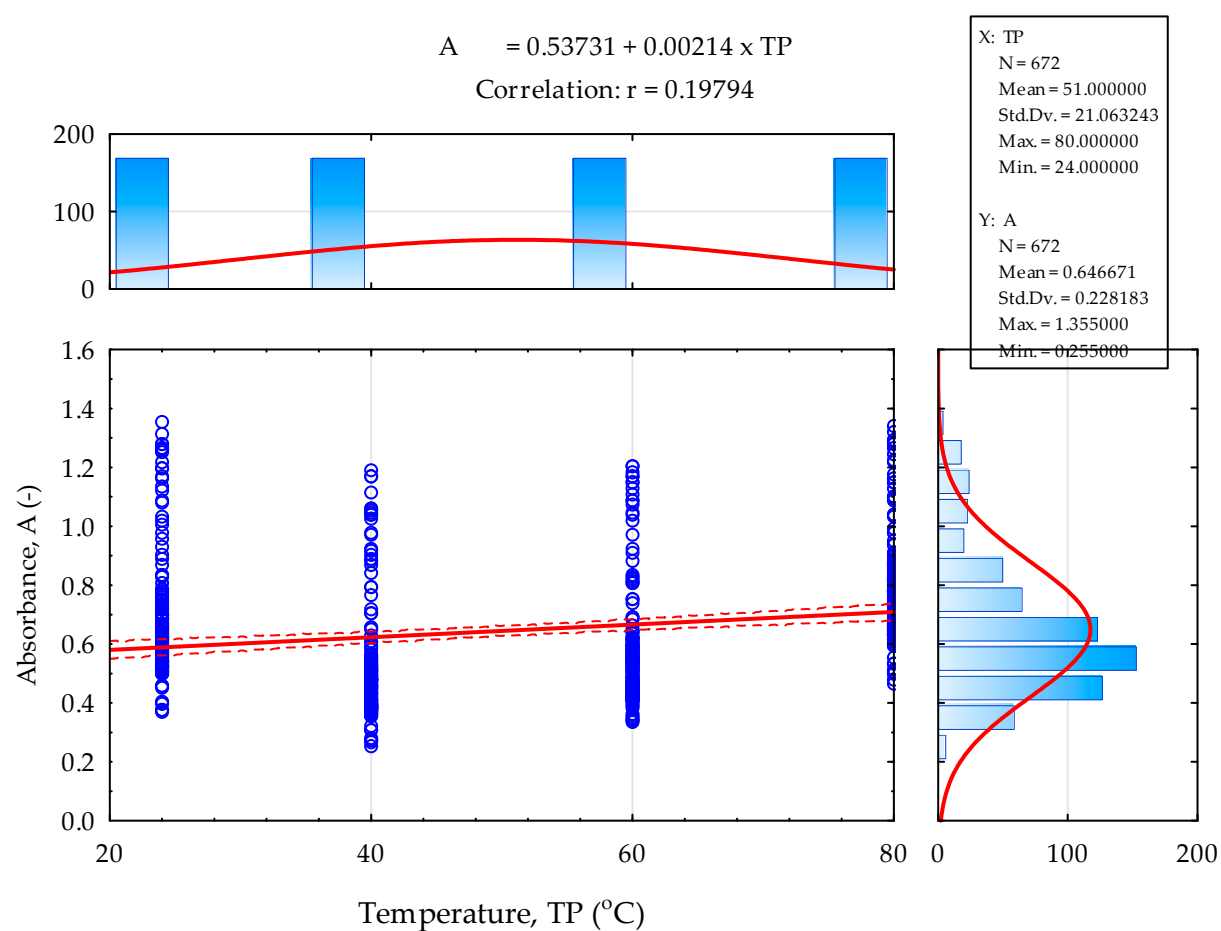

**Figure S3.** Scatterplot of absorbance versus temperature at 95% confidence interval.



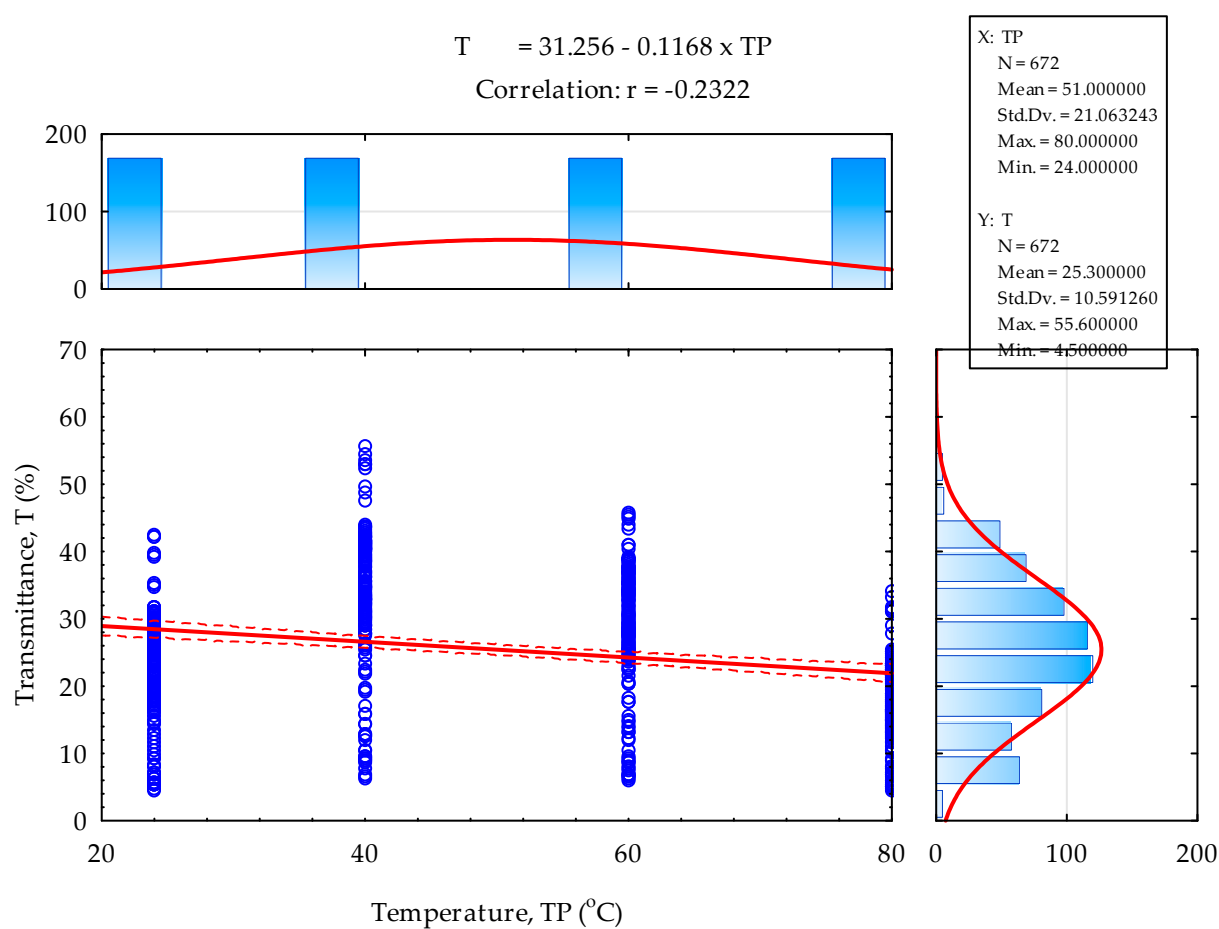

**Figure S4.** Scatterplot of transmittance versus temperature at 95% confidence interval.
